# Supplementary material for: Respiratory viruses among ethnic Nicobarese during COVID-19 pandemic
Source: BMC Infect Dis. 2022 May 14;22:463. doi: 10.1186/s12879-022-07435-x (PMC9107012; doi:10.1186/s12879-022-07435-x)
Supplement: Supplementary file 1 — Additional file 1. Raw data. [file 12879_2022_7435_MOESM1_ESM.xlsx]

## Sheet: Table 1
								1	Male	1	Outpatient
		Table 1. Demographic characteristics of patients with ILI in Car-Nicobar, India (2019 – 2021)						2	Female	2	Inpatients
		Characteristics	All patients	Hospital settings			Age			Gender		Prepandemic	Pandemc	Total
			(N = 428, %)	Inpatient (N = 142, %)	Outpatient		Total	IP	OP	IP	OP	1	2	2
					(N = 286, %)		1.9	1.9	50	1	1	1	2	2
		Gender					1.6	1.6	13	2	2	1	2	2
		Male	212 (49.5)	57(40.1)	155 (54.2)		0.5	0.5	16	2	2	2	2	1
		Female	216 (50.5)	85(59.9)	131(45.8)		50	7	58	1	1	1	2	2
		Median Age Years	35.5	40.5	34		7	0.5	25	1	2	1	2	2
		(IQR)	(17 – 52)	(6.75 – 59.25)	(17 – 51))		0.5	9.7	16	1	2	1	2	2
		Age (Years)					9.7	10	36	1	2	1	2	2
		0 – 5	60 (14.4)	34( 24.1)	26 (9.4)		10	73	6	2	1	2	2	1
		6 – 15	45 (10.8)	9 (6.4)	36 (13.0)		13	8	4	1	1	2	2	1
		16 – 25	47 (11.2)	7 (5.0)	40 (14.4)		16	1.9	12	1	2	1	2	2
		26 – 35	62 (14.5)	12 (8.5)	50 (17.5)		73	2.9	8	1	1	2	2	1
		36 – 45	62 (14.5)	20 (14.1)	42 (14.7)		58	52	5	2	2	2	2	1
		46 – 55	63 (14.7)	22 (15.7)	41 (14.3)		25	45	30	1	1	2	2	1
		56 – 65	49 (11.4)	16 (11.3)	33 (11.5)		16	1.1	11	1	1	1	2	2
		≥65	40 (9.3)	22 (15.5)	18 (6.3)		8	1.7	41	1	1	1	2	2
		Pre-pandemic	172 (40.1)	53 (37.3)	119 (41.6)		1.9	2	26	1	1	1	2	2
		(June 2019 – July 2020)					2.9	2	42	1	1	1	2	2
		During pandemic	256 (59.9)	89 (62.7)	167 (58.4)		52	2	45	2	1	1	2	2
		(August 2020 – May 2021)					45	0.5	36	2	2	2	2	1
							36	0.8	64	2	2	2	2	1
							6	9	4.3	2	2	2	2	1
							4	1.9	29	2	2	2	2	1
							12	1.4	26	1	2	2	2	1
							8	2.5	39	2	2	2	2	1
							5	4	65	2	2	2	2	1
							30	2	14	2	1	2	2	1
							11	38	60	1	1	2	2	1
							41	67	25.3	1	2	2	2	1
							26	63	0.6	1	2	2	2	1
							42	52	19	1	2	1	2	2
							1.1	0.1	35	2	2	1	2	2
							1.7	10	25	2	2	1	1	2
							2	52	14	2	1	1	1	2
							2	1.3	5	1	1	1	2	2
							2	1.2	4	2	1	1	2	2
							0.5	10	30	2	2	1	1	2
							0.8	50	55	1	1	1	2	2
							9	76	50	1	2	1	2	2
							1.9	52	0.5	2	2	1	2	2
							1.4	2	43	2	2	1	2	2
							2.5	2	29	2	2	1	2	2
							4	1	6	2	1	1	2	2
							2	1	33	2	2	2	2	1
							45	64	15	2	1	1	2	2
							38	1.7	40	2	2	1	1	2
							67	0.3	68	1	2	1	1	2
							63	1	60	1	2	2	1	1
							36	0.9	77	2	2	2	1	1
							64	4	20	2	2	2	2	1
							4.3	25	64	2	2	2	2	1
							29	29	2	1	2	2	2	1
							26	32	55	1	2	2	2	1
							39	22	2	1	2	2	2	1
							65	53	51	2	2	2	2	1
							14	53	55	2	1	2	1	1
							60	55	68	2	1	2	1	1
							25.3	41	45	2	2	2	1	1
							0.6	65	52	2	2	2	1	1
							19	66	7	2	2	2	1	1
							35	42	65	2	1	1	1	2
							52	61	9	2	2	2	1	1
							25	55	52	2	2	2	1	1
							14	38	63	2	1	1	1	2
							0.1	62	28	2	2	1	1	2
							10	42	55	1	1	1	1	2
							52	74	45	1	2	1	1	2
							1.3	68	85	1	1	1	1	2
							1.2	56	42	1	2	1	1	2
							10	80	6	2	1	1	1	2
							50	60	30	2	2	1	1	2
							76	40	38	2	2	1	1	2
							52	75	75	2	2	1	1	2
							2	20	60	2	2	1	2	2
							2	77	70	2	2	1	2	2
							1	26	67	2	1	1	2	2
							1	29	62	2	2	1	2	2
							64	64	61	2	1	2	2	1
							5	65	60	1	1	2	2	1
							4	45	75	1	1	2	2	1
							30	46	26	2	1	2	2	1
							55	48	59	2	2	2	2	1
							50	40	60	1	1	2	2	1
							0.5	31	42	1	2	2	2	1
							43	38	52	1	2	2	1	1
							29	50	51	2	1	2	1	1
							6	37	50	1	2	2	1	1
							33	45	18	1	2	2	1	1
							15	26	60	1	2	1	1	2
							1.7	55	80	1	1	1	1	2
							0.3	48	6	1	1	1	1	2
							1	72	52	1	2	1	1	2
							0.9	80	51	1	1	1	1	2
							4	19	71	2	2	2	1	1
							40	52	85	2	2	2	2	1
							68	41	51	1	2	2	2	1
							60	26	40	1	1	2	2	1
							77	70	37	1	1	2	2	1
							20	23	37	1	2	2	1	1
							64	44	45	1	2	1	1	2
							25	53	60	1	1	2	1	1
							2	27	19	1	2	2	1	1
							55	68	24	2	1	2	1	1
							2	70	31	2	1	2	1	1
							51	70	34	2	1	2	1	1
							55	55	31	2	1	2	1	1
							68	56	47	2	1	2	1	1
							45	45	27	2	1	2	1	1
							52	60	43	2	1	2	1	1
							7	51	45	2	1	2	1	1
							65	32	32	2	1	2	1	1
							9	70	32	2	1	2	1	1
							52	21	53	1	1	2	1	1
							63	40	37	2	1	2	1	1
							28	50	60	2	2	2	1	1
							55	35	21	2	2	2	1	1
							45	52	16	2	1	2	1	1
							85	54	24	2	1	2	1	1
							42	75	34	2	2	2	1	1
							6	36	13	2	2	2	1	1
							30	65	64	2	1	2	1	1
							38	63	66	2	2	2	1	1
							75	24	62	2	1	2	1	1
							60	65	34	2	1	2	1	1
							70	40	40	2	2	2	1	1
							67	59	60	2	2	2	1	1
							62	68	19	2	2	2	1	1
							61	60	12	2	1	2	1	1
							60	14	70	2	1	2	2	1
							75	45	2	2	2	2	2	1
							26	52	28	2	2	2	1	1
							59	42	29	2	1	2	1	1
							60	80	14	2	2	2	1	1
							42	34	49	1	1	2	1	1
							52	32	28	2	2	2	1	1
							51	70	19	1	2	2	1	1
							50	6	25	1	1	2	1	1
							18	3	26	2	2	2	1	1
							60	2	7	1	1	2	1	1
							80	0.7	14	1	2	2	1	1
							6	1	13	1	1	2	1	1
							52	72	1	2	2	2	1	1
							51	70	31	1	2	2	1	1
							71		36		1	2	2	1
							85		32		2	2	2	1
							51		65		1	2	1	1
							40		23		2	2	1	1
							37		17		2	2	1	1
							37		56		2	2	1	1
							45		16		1	2	1	1
							60		36		1	2	1	1
							19		7		1	2	1	1
							24		21		2	2	1	1
							31		30		2	2	2	1
							34		22		1	2	2	1
							31		16		1	2	2	1
							47		31		2	2	1	1
							27		23		1	2	1	1
							43		3		1	2	1	1
							45		32		1	2	1	1
							32		32		1	2	1	1
							32		7		2	2	1	1
							53		22		2	2	2	1
							37		13		1	2	2	1
							60		38		1	2	2	1
							21		52		1	2	1	1
							16		20		1	2	1	1
							24		20		1	2	1	1
							34		35		1	2	1	1
							13		50		2	1	1	2
							29		24		1	1	1	2
							32		11		1	1	1	2
							22		49		2		1	2
							53		36		1		1	2
							53		29		1		2	2
							55		33		1		2	2
							41		11		1		2	2
							65		34		2		1	2
							66		55		1		1	2
							42		50		1		1	2
							61		60		1		1	2
							55		35		1		1	2
							38		22		2		1	2
							62		10		1		2	2
							42		31		2		2	2
							74		65		2		2	2
							68		34		2		2	2
							56		45		2		2	2
							80		84		1		1	2
							60		25		1		1	2
							40		58		2		1	2
							75		61		1		1	2
							20		23		1		1	2
							77		17		1		1	2
							26		24		1		1	2
							29		57		1		1	2
							64		39		1		1	2
							65		2		2		1	2
							45		27		1		1	2
							46		42		1		1	2
							48		14		1		1	2
							40		10		1		1	2
							31		17		1		1	2
							38		55		1		1	2
							50		16		2		1	1
							64		14		2		1	1
							66		45		1		1	2
							37		45		2		1	2
							45		35		2		1	1
							62		70		2		1	2
							26		28		1		1	2
							55		40		2		2	2
							48		14		2		2	2
							72		47		2		1	2
							80		52		1		1	2
							19		65		1		1	2
							52		61		2		1	2
							41		44		2		1	1
							34		50		1		1	1
							40		54		1		1	1
							60		57		2		1	1
							19		59		2		1	2
							26		50		1		1	2
							70		22		1		2	2
							23		16		1		2	2
							44		18		2		1	2
							53		9		1		1	2
							27		46		1		1	1
							12		4		1		1	1
							70		29		1		1	1
							2		70		2		1	1
							28		2		2		1	1
							29		3		2		1	1
							14		50		1		1	1
							49		60		1		1	1
							28		30		1		1	1
							19		48		2		1	1
							25		33		1		1	1
							26		32		1		1	1
							7		15		2		1	1
							14		36		2		1	1
							13		49		1		1	1
							1		32		1		1	1
							31		33		1		2	1
							36		23		2		2	1
							32		40		1		1	2
							68		8		1		2	2
							70		46		1		2	2
							70		0.7		1		1	2
							55		50		1		1	2
							56		1		2		1	2
							45		0.9		2		1	2
							60		0.8		2		1	2
							51		70		1		1	2
							32		40		2		1	2
							70		55		1		1	2
							21		42		1			1
							65		28		1			1
							23		2		1			1
							17		3		1			1
							56		50		2			1
							16		39		1			1
							36		9		1			1
							7		1		2			1
							21		43		2			1
							30		1		1			1
							22		15		1			2
							40		2		1			2
							50		16		2			2
							35		26		2			2
							52		46		1			1
							16		1		2			1
							31		7		2			1
							23		25		1			1
							3		19		1			1
							32		33		1			1
							32		14		2			1
							7		52		2			1
							22		37		1			1
							13		37		1			1
							38		60		1			1
							52		37		1			1
							20		52		1			1
							20		34		1			1
							35		78		1			1
							50		50		1			1
							24		37		1			1
							11							1
							49							1
							36							1
							29							1
							33							1
							11							1
							34							1
							55							1
							50							1
							60							1
							35							1
							22							1
							10							1
							31							2
							54							2
							75							1
							65							1
							34							1
							45							1
							84							1
							25							1
							58							1
							61							1
							23							1
							17							1
							24							1
							57							1
							39							1
							2							2
							36							2
							65							1
							27							1
							42							1
							14							1
							10							1
							17							1
							55							1
							16							1
							14							2
							63							2
							24							2
							65							1
							45							1
							45							1
							35							1
							70							1
							40							1
							59							2
							68							2
							28							2
							40							1
							14							1
							47							1
							52							1
							65							1
							61							1
							44							1
							50							1
							54							1
							57							2
							60							2
							14							2
							45							1
							59							1
							50							1
							22							1
							16							1
							18							1
							9							2
							52							2
							42							2
							80							2
							34							2
							32							1
							46							1
							4							1
							29							1
							70							1
							2							1
							3							1
							50							1
							60							1
							30							1
							48							1
							33							1
							32							1
							15							1
							36							1
							49							1
							32							1
							33							1
							23							1
							40							1
							8							1
							46							1
							0.7							1
							50							2
							70							2
							6							1
							1							1
							0.9							1
							0.8							1
							70							1
							40							1
							55							1
							42							1
							28							1
							2							1
							3							2
							3							2
							2							1
							50							1
							39							1
							9							1
							1							1
							43							1
							1							1
							15							1
							2							1
							16							1
							26							1
							46							1
							1							1
							7							1
							25							1
							19							1
							33							1
							14							1
							0.7							2
							1							2
							52							1
							72							2
							70							2
							37							1
							37							1
							60							1
							37							1
							52							1
							34							1
							78							1
							50							1
							37

## Sheet: Table 2
	Table 2. Gender and Age- wise prevalence of respiratory viruses in Car-Nicobar, India
	Respiratory viruses	Gender			Age (years)
		Male	%	Female		0 - 5	6 -15y	16 - 25	26 – 35	36 - 45	46 - 70
	Influenza A (H1N1 pdm 09)	1	1.96078	4	8.51064	2	0	0	0	2	1
	Influenza A (H3N2)	29	56.8627	20	42.5532	4	13	12	8	2	11
	hMPV	5	9.80392	8	17.0213	7	4	1	0	1	0
	RSV A	2	3.92157	0	0	2	0	0	0	0	0
	Rhinovirus	10	19.6078	1	2.12766	1	1	3	2	0	3
	PIV - 4	1	1.96078	0	0	0	0	0	0	1	0
	Adenovirus	2	3.92157	2	4.25532	3	1	0	0	0	0
	HCoV - OC – 43	0	0	2	4.25532	2	0	0	0	0	0
	HCoV – HKU1	1	1.96078	0	0	0	0	0	1	0	0
	Total	51	100	37	78.7234	21	19	16	11	6	15	88
					%	23.8636	21.5909	18.1818	12.5	6.81818	17.0455	100

## Sheet: Figure 1
	Symptomatic cases of Influenza-like illness in Car-Nicobar
	Fever	Chill	Rigors	Cough	Sputum Production	Haemotysis	Sore Throat	Nasal Discharge/stuffiness	Ear Ache/Discharge	Headache	Body Ache	Malaise/ Fatigue	Chest pain	Abdominal pain	Vomiting/ nausea	Diarrhoea	Breathlessness	Seizures
	1			1			1	1		1							1
		1		1			1	1									1
		1		1				1									1			Symptoms	Frequency	Percentage	Frequency	Percentage
	1	1	1	1			1				1										1		2
	1	1		1	1		1			1	1	1	1	1	1					Fever	225	53.8278	193	46.1722
	1			1													1			Chills	118	28.2297	300	71.7703
	1	1	1	1			1	1		1	1	1	1	1	1					Rigors	43	10.2871	375	89.7129
	1			1	1		1	1							1		1			Cough	328	78.4689	90	21.5311
				1				1		1					1			1		Sputum production	16	3.82775	402	96.1722
	1	1	1	1			1			1	1	1								Haemoptysis	2	0.478469	416	99.5215
	1	1		1						1	1		1	1			1			Sore throat	96	22.9665	322	77.0335
				1			1						1							Runny nose	170	40.6699	248	59.3301
				1			1	1										1		Head ache	96	22.9665	322	77.0335
	1			1		1	1	1		1	1		1	1			1			Bodypain	99	23.6842	319	76.3158
	1	1	1	1				1				1			1		1			Malaise	36	8.61244	382	91.3876
	1	1	1	1			1	1							1		1			Chestpain	104	24.8804	314	75.1196
	1	1	1	1			1	1		1	1		1							Breathlessness	172	41.1483	246	58.8517
	1	1	1	1			1			1	1		1	1			1
		1	1							1	1			1
				1			1	1		1	1		1	1			1
	1	1	1	1			1	1		1					1
	1	1	1	1			1	1		1							1
		1	1	1				1		1			1				1
	1			1				1					1		1		1
	1	1	1	1			1	1		1	1		1	1
				1			1	1		1	1		1
	1	1	1	1			1	1		1			1		1
		1	1	1		1						1					1
	1	1	1	1						1		1	1
				1			1	1			1	1	1	1
	1			1				1					1				1
				1				1				1			1		1
	1	1	1	1	1			1		1	1	1	1		1		1
	1	1	1	1	1		1	1		1	1	1	1	1	1		1
	1	1	1	1	1		1	1		1			1
	1			1	1		1	1		1			1
				1	1			1				1			1		1
	1	1	1	1				1									1
	1	1	1	1				1		1					1		1
	1			1	1			1									1
	1	1	1	1				1		1		1	1		1		1
	1			1				1				1
				1	1			1				1	1				1
				1			1
	1									1
																	1
	1	1	1	1				1		1				1	1		1
		1	1	1						1	1
				1				1
	1	1	1	1			1	1		1	1	1
				1						1
				1			1			1	1
		1	1	1							1	1	1				1
	1	1	1	1						1	1		1
				1			1	1			1		1
				1			1	1		1	1	1	1
	1	1		1			1	1					1
	1	1	1	1			1	1		1
				1			1	1		1	1	1	1
				1	1		1	1		1	1	1	1
				1			1			1			1				1
				1			1	1		1	1	1	1		1
	1			1				1							1		1
		1	1	1				1
	1		1	1			1	1		1	1		1	1			1
				1			1	1					1				1
	1			1			1	1					1				1
	1			1	1		1	1	1	1	1		1		1
				1						1	1		1
				1							1	1	1				1
				1			1	1		1	1		1				1
	1	1	1	1	1		1	1					1				1
	1		1	1				1									1
	1			1				1
		1		1				1							1
				1			1			1	1	1	1	1			1
	1			1				1
	1	1	1	1				1		1
				1							1						1
	1	1	1	1				1			1		1
				1				1
	1
				1			1
				1			1	1
				1				1									1
				1			1	1					1
	1	1	1	1						1	1
	1		1		1		1						1		1		1	1
		1	1	1	1		1	1					1			1	1
	1			1				1
	1			1				1							1
				1	1			1
		1		1			1			1	1		1	1
				1			1						1	1			1
	1			1						1	1	1	1	1
				1			1				1
		1		1			1	1		1				1
			1	1			1				1		1	1				1
				1			1								1
	1			1			1				1		1	1
		1		1				1
				1			1			1	1		1
				1			1			1	1		1
				1						1							1
				1				1		1	1		1		1		1
		1		1						1	1		1	1			1
	1	1		1				1		1	1			1
		1		1				1									1
	1	1		1				1
	1	1		1				1		1	1		1	1
		1		1				1									1
	1	1		1				1		1	1	1	1	1	1		1
		1		1							1			1
				1													1
	1	1		1							1		1	1			1
		1		1						1	1		1
		1		1				1						1	1
				1
		1		1													1
	1	1		1				1		1	1		1				1
		1		1							1
	1	1		1									1				1
	1	1		1
		1		1									1
				1			1				1						1
				1			1			1	1		1
				1						1	1		1
	1			1			1			1	1		1				1
				1						1	1						1
				1
				1						1	1
				1						1	1		1
	1			1			1			1			1
				1			1			1	1		1
							1
				1			1				1		1				1
				1						1	1		1				1
				1			1	1
				1									1
	1			1
				1
	1	1	1	1						1	1	1	1
	1			1							1
				1						1	1
				1						1
				1									1				1
				1
				1
				1
							1
				1
							1
				1
							1
				1
	1										1
				1
							1
	1			1
	1			1
	1			1
	1			1
	1			1
							1
							1
	1										1
	1
													1
	1			1
				1							1
	1			1													1
	1			1
																	1
																	1
	1									1					1
	1			1
	1			1													1
	1			1													1
	1			1
																	1
																	1
																	1
	1			1
	1										1
	1	1															1
	1																1
																	1
																	1
																	1
	1																1
	1										1
	1														1
																	1
							1
								1
	1			1										1
	1			1
				1				1		1	1		1				1
	1
	1
	1	1															1
	1
	1																1
	1			1
																	1
	1
	1	1		1	1				1	1	1	1	1	1			1
				1									1
	1	1		1			1			1		1	1
				1			1	1
	1			1													1
																	1
	1			1						1							1
				1													1
	1
	1	1
	1	1		1				1		1
	1						1			1	1
	1			1			1	1
	1			1			1	1
	1			1			1	1		1	1	1	1		1		1
				1			1				1
	1			1				1			1
	1			1
	1	1	1	1			1										1
	1			1			1				1		1
	1							1		1		1					1
	1			1				1
	1						1				1			1			1
	1	1		1			1										1
	1			1			1			1	1
	1			1			1	1
	1		1	1			1	1		1	1	1	1
																	1
																	1
																	1
																	1
																	1
																	1
	1														1		1
	1
	1																1
	1																1
	1																1
	1	1		1				1					1				1
	1			1			1	1		1				1			1
	1	1		1				1									1
								1		1							1
	1	1		1			1				1		1				1
	1	1		1			1	1			1			1			1
	1			1				1		1		1	1
	1						1	1				1					1
				1			1	1				1	1				1
				1				1					1
	1			1													1
	1			1
	1			1
	1			1													1
	1	1		1				1		1							1
				1				1
				1				1
	1			1				1						1	1		1
	1	1		1				1
				1				1
				1				1		1
				1				1		1
	1			1				1
	1			1				1
				1				1
				1				1					1				1
	1			1				1					1	1			1
	1			1							1
	1	1		1							1		1	1	1
				1				1			1
	1			1				1						1
	1			1						1			1	1			1
	1		1	1			1						1	1	1
	1			1				1		1	1		1
	1			1				1			1
	1			1			1	1							1
	1			1				1		1
	1			1				1		1							1
	1			1													1
	1			1								1	1				1
	1									1							1
				1				1
	1			1				1			1
				1			1	1
	1																1
	1																1
	1	1		1				1			1
				1													1
				1						1				1			1
	1			1									1				1
	1			1
	1			1													1
	1			1				1									1
	1			1			1				1						1
	1			1				1
				1			1	1			1
				1										1
				1							1		1	1
			1					1
	1			1							1
	1	1
	1			1				1
	1			1				1
	1			1			1	1
	1	1		1				1
	1			1				1									1
	1			1										1			1
	1			1				1		1
	1			1				1		1			1
	1
	1			1
	1			1									1
				1				1			1		1
				1				1			1		1				1
				1
																	1
																	1
	1			1
		1		1
	1	1		1
	1	1		1
	1			1				1					1
				1				1					1
		1		1
	1	1		1
		1		1
		1		1
	1			1
	1			1							1
				1													1
	1
	1			1
				1						1
		1		1
		1		1
				1				1
				1				1									1
																	1
																	1
																	1
				1									1				1
																	1
	1	1		1
		1		1
	1			1				1									1
	1			1				1									1
	1			1
		1		1				1
				1				1
		1															1
				1				1
				1				1									1
		1		1
				1				1		1							1
				1				1			1
				1				1					1
	1			1				1
	1			1				1									1
				1				1
				1				1
	1			1				1
	1			1				1									1
	1			1				1
				1				1			1	1	1
		1		1										1			1
	1	1		1				1									1
	1	1		1				1
	1	1		1													1
	1	1		1													1
	1			1											1		1
		1		1				1
	1			1
	1	1		1
	1	1		1				1
	1	1		1				1									1
	1			1				1									1
	1	1		1											1		1
		1		1				1									1
		1		1													1
	1			1				1
		1		1
	1	1		1				1									1
				1				1									1
				1				1									1
	1			1			1										1
	1	1		1				1									1
	1	1		1									1
		1		1				1
		1	1														1
	1	1		1											1	1	1
	1			1				1									1
	1	1		1									1				1
	1			1								1
		1		1							1
	1	1		1													1
	1	1		1											1	1	1
	1	1		1													1
	1	1		1
	1	1		1										1			1
																		1
											1
																		1
	1
																		1
																		1
	1																	1
																		1
	1

## Sheet: Figure 2
	VIRUS	POSITIVE CASES
	INFLUENZA-A (H1N1-PDM)	5	5.68182
	INFLUENZA- A (H3N1)	49	55.6818
	RHINO VIRUS	11	12.5
	ADENO VIRUS	4	4.54545
	HMPV	13	14.7727
	PIV	1	1.13636
	Human Corona virus (OC 43)	2	2.27273
	RSV A	2	2.27273
	Human Corona virus (HKU 1)	1	1.13636
	TOTAL	88	100

## Sheet: Figure 3
	Distribution of cases during pandemic and Pre-pandemic
	Month	Respiratory virus identified	No of enrolled patients	Total no of cases attended
	2019-06-01	0	4	4
	2019-07-01	0	2	2
	2019-08-01	0	0	0
	2019-09-01	9	20	20
	2019-10-01	7	18	18
	2019-11-01	0	0	0
	2019-12-01	0	9	12
	2020-01-01	3	32	32
	2020-02-01	2	11	12
	2020-03-01	0	26	26
	2020-04-01	3	24	24
	2020-05-01	0	0	0
	2020-06-01	3	19	19
	2020-07-01	0	0	3
	2020-07-01	0	0	3
	2020-08-01	0	0	0
	2020-09-01	0	0	7
	2020-10-01	0	0	12
	2020-11-01	0	0	7
	2020-12-01	14	25	53
	2021-01-01	35	67	83
	2021-02-01	2	9	12
	2021-03-01	2	6	14
	2021-04-01	8	48	57
	2021-05-01	0	0	10
				430

## Sheet: Figure 4
			Month wise surveillance of non-SARS CoV-2 over the pandemic and pre-pandemic in Car-Nicobar
			Months	Total No. of Samples	Influenza-A (H3N2)	Influenza-A (H1N1 - pdm09)	HMPV	RSV A	Rhino virus	Adeno virus	PIV-4	HCoV-OC43	HCoV- HKU-1
			2019-06-01	4	0	0	0	0	0	0	0	0	0
			2019-07-01	2	0	0	0	0	0	0	0	0	0
			2019-08-01	0	0	0	0	0	0	0	0	0	0
			2019-09-01	20	0	0	8	0	0	1	0	0	0
			2019-10-01	18	0	0	5	2	0	0	0	0	0
			2019-11-01	0	0	0	0	0	0	0	0	0	0
			2019-12-01	9	0	0	0	0	0	0	0	0	0
			2020-01-01	32	0	2	0	0	0	1	0	0	0
			2020-02-01	11	0	1	0	0	1	0	0	0	0
			2020-03-01	26	0	0	0	0	0	0	0	0	0
			2020-04-01	24	0	2	0	0	0	0	1	0	0
			2020-05-01	0	0	0	0	0	0	0	0	0	0
			2020-06-01	19	0	0	0	0	0	0	0	2	1
			2020-07-01	0	0	0	0	0	0	0	0	0	0
			2020-08-01	0	0	0	0	0	0	0	0	0	0
			2020-09-01	0	0	0	0	0	0	0	0	0	0
			2020-10-01	0	0	0	0	0	0	0	0	0	0
			2020-11-01	0	0	0	0	0	0	0	0	0	0
			2020-12-01	25	14	0	0	0	0	0	0	0	0
			2021-01-01	65	32	0	0	0	3	0	0	0	0
			2021-02-01	11	1	0	0	0	1	0	0	0	0
			2021-03-01	6		0	0	0	2	0	0	0	0
			2021-04-01	48	2	0	0	0	4	2	0	0	0
